# Supplementary material
Source: publisher site journal article supplement (https://www.dovepress.com/article/supplementary_file/573811/573811%20Revised%20Supplementary%20Table%20S1.docx)
Supplement: Supplementary file 1 [file 573811%20Revised%20Supplementary%20Table%20S1.docx]

**Supplementary Table S1. Deficiency definitions and sources.**

Deficiency was defined as a value below the cut-off shown.

| **Analyte** | **Unit** | **Deficiency cut-off** |
| --- | --- | --- |
| Hemoglobin | g/dL | < 12 |
| Albumin | g/dL | < 3.5 |
| Sodium | mEq/L | < 136 |
| Potassium | mEq/L | < 3.1 |
| Chloride | mEq/L | < 98 |
| Calcium | mg/dL | < 8.2 |
| Corrected calcium (albumin-adjusted) | mg/dL | < 8.5 |
| Magnesium | mg/dL | < 1.6 |
| Phosphorus | mg/dL | < 2.5 |
| Iron | µg/dL | < 28 |
| Ferritin | ng/mL | < 18.5 |
| Vitamin B12 | pg/mL | < 214 |
| Folate (folic acid) | ng/mL | < 3.37 |
| 25-hydroxyvitamin D | ng/mL | < 10 |
| Zinc | µg/mL | < 0.7 |
| Selenium | ng/mL (≡ µg/L) | < 63 |

**Footnote:**

1) All tests were performed in the hospital central laboratory as part of routine clinical care using standardized, quality-controlled methods.

2) For vitamin D, the study reports severe deficiency using a 25(OH)D threshold of <10 ng/mL; prevalence estimates would be higher under commonly used thresholds (e.g., <20 ng/mL).

3) Cut-offs are based primarily on institutional laboratory reference limits and were chosen to match how deficiency prevalence was calculated in the manuscript tables.

**Supplementary Table S1. Deficiency definitions and sources**

Micronutrient deficiency was defined as a value below the cut-off shown. All laboratory tests were performed in the hospital central laboratory as part of routine clinical care using standardized, quality-controlled methods. Cut-offs were based primarily on institutional laboratory reference limits and were selected to match the thresholds used to calculate deficiency prevalence in the manuscript tables. For vitamin D, deficiency is reported using a severe deficiency threshold (25[OH]D <10 ng/mL); prevalence would be expected to be higher under commonly used thresholds (e.g., <20 ng/mL). Selenium is expressed as ng/mL (equivalent to µg/L).
